# Supplementary material for: Frequent expression loss of Inter-alpha-trypsin inhibitor heavy chain (ITIH) genes in multiple human solid tumors: A systematic expression analysis
Source: Springer Nature journal article supplement (doi:10.1186/1471-2407-8-25), 2008-01-28

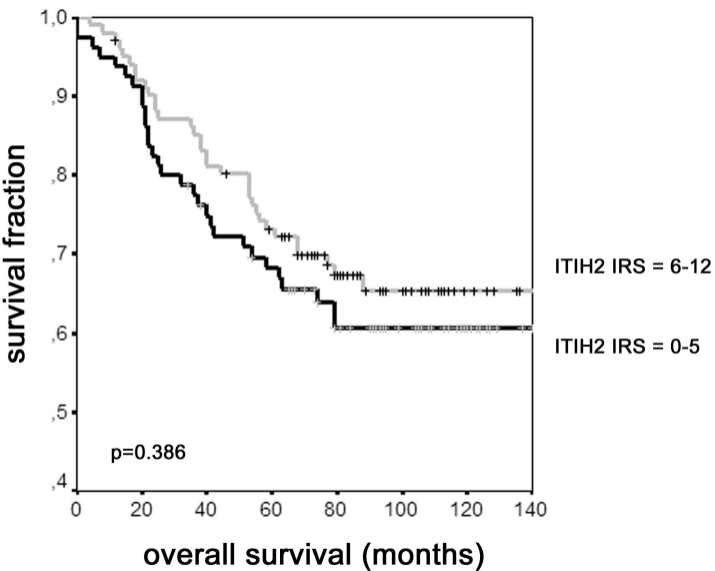

Supplement: 12885_2007_963_MOESM5_ESM.pdf [file 12885_2007_963_MOESM5_ESM.pdf]
